# Supplementary material for: Functional metabolomics using UPLC-Q/TOF-MS combined with ingenuity pathway analysis as a promising strategy for evaluating the efficacy and discovering amino acid metabolism as a potential therapeutic mechanism-related target for geniposide against alcoholic liver disease
Source: Royal Society of Chemistry journal article supplement (doi:10.1039/c9ra09305b), 2020-01-01
Supplement: c9ra09305b1.pdf [file c9ra09305b1.pdf]

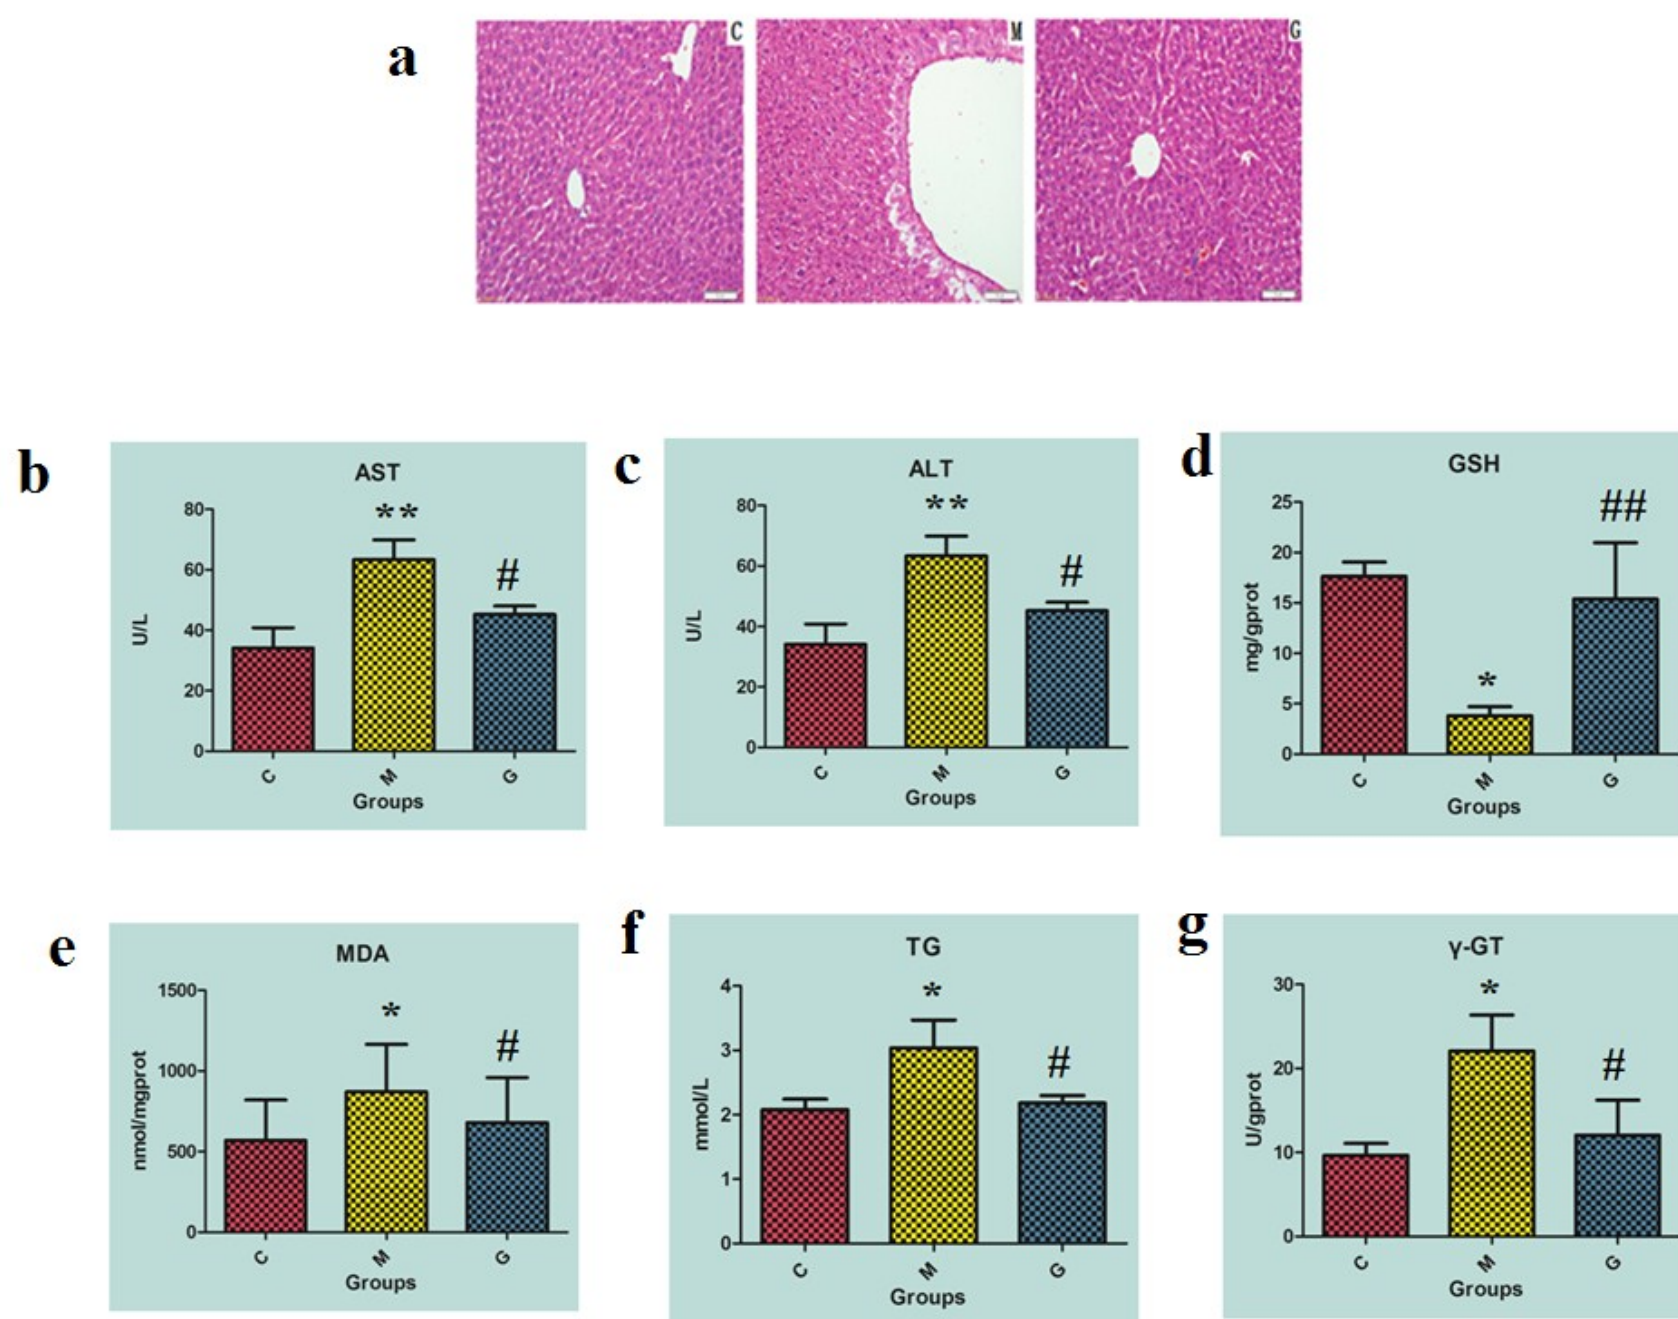

**Fig.S1** (a) HE staining morphology of liver tissue in normal, model and geniposide-treated group of mouse under microscope ( $\times 200$ ). (b)~(g) The biochemical indexes analysis of mouse, including AST, ALT, GSH, MDA, TG and  $\gamma$ -GT in normal, model and geniposide-treated group. Compared with the control group, " \* " represent a significant difference ( $P < 0.05$ ); " \*\* " represent extremely difference ( $P < 0.01$ ). Compared with the model group, "# " represent a significant difference ( $P < 0.05$ ); "## " represent extremely difference ( $P < 0.01$ ). C: control group; M: model group; G: geniposide-treated group.

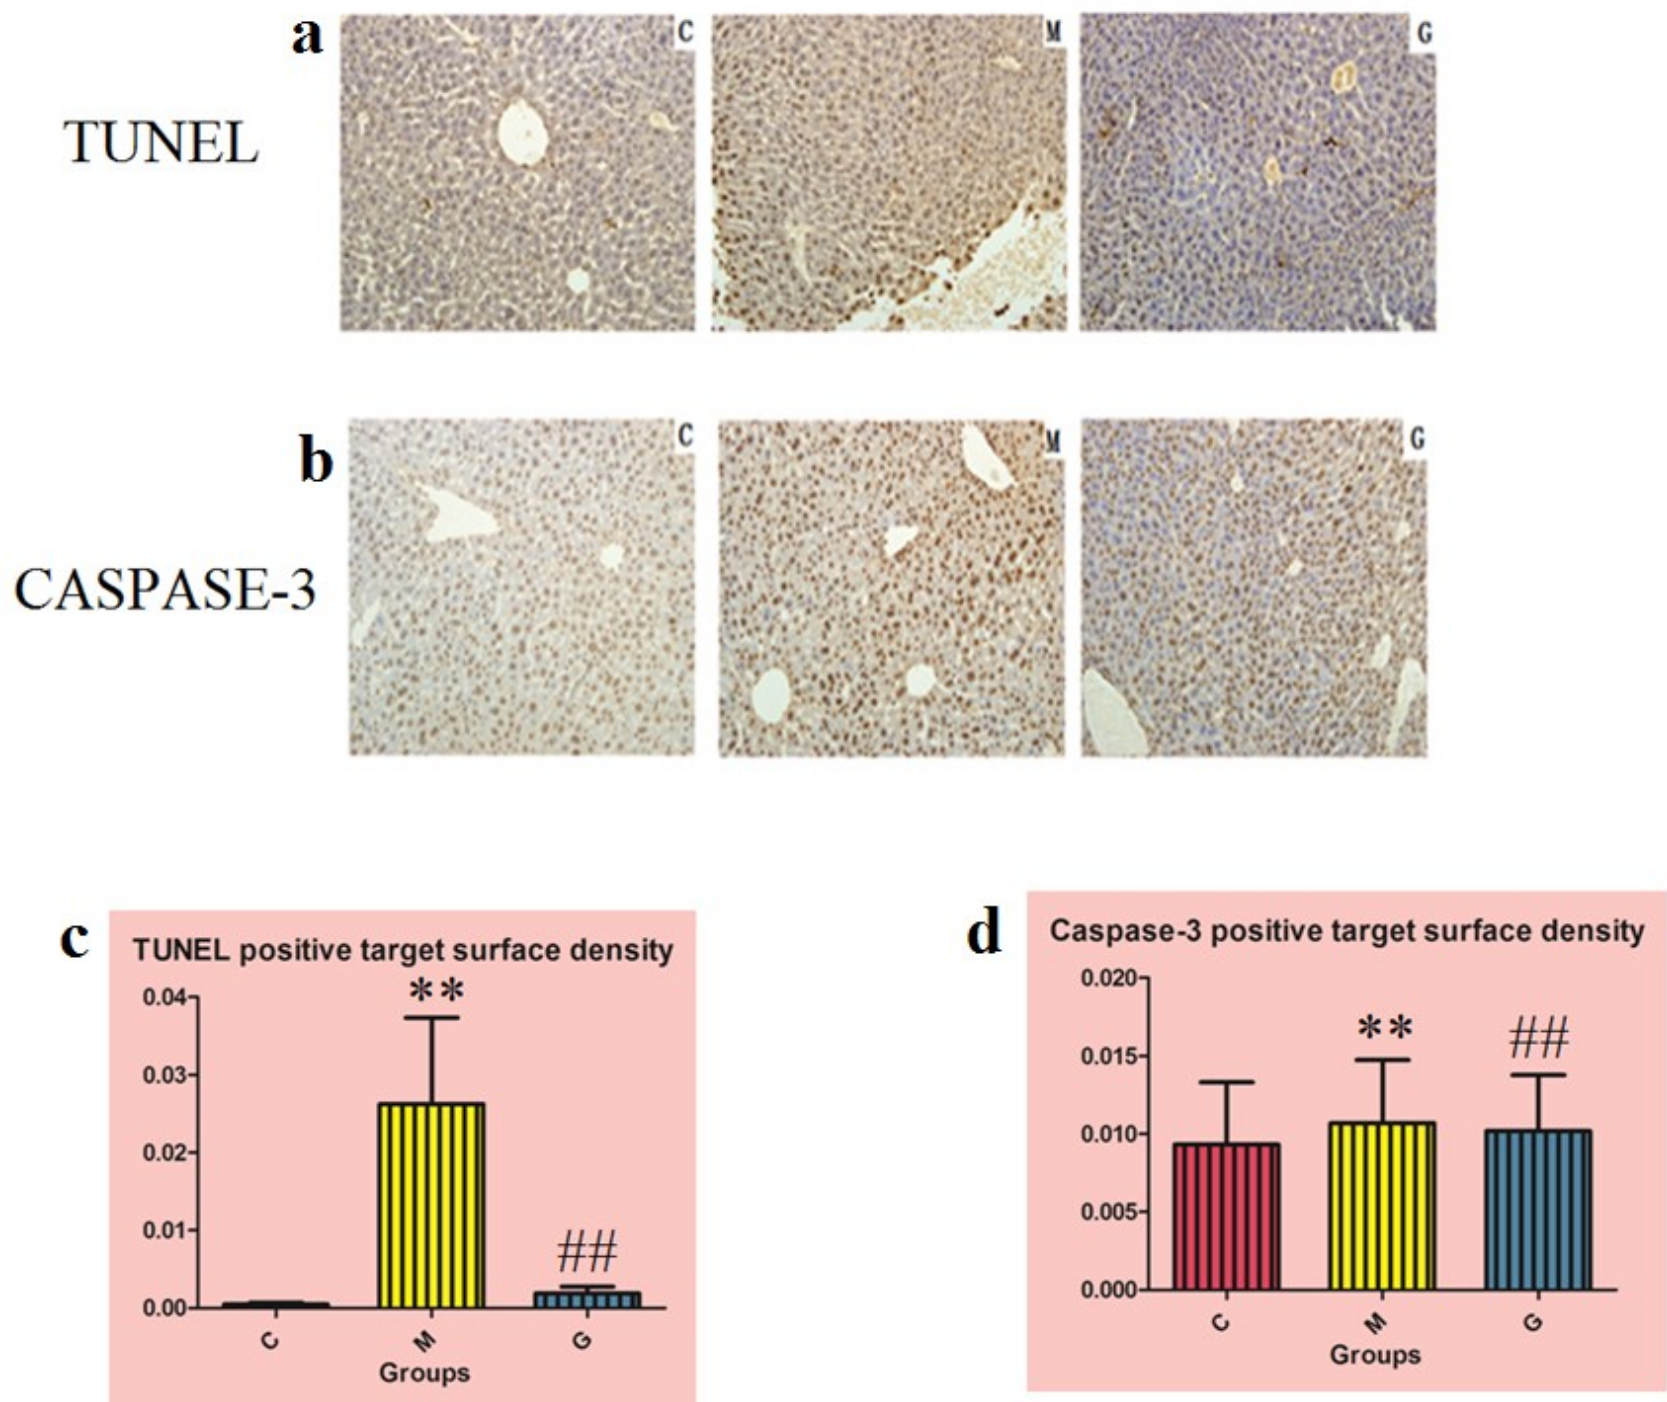

**Fig.S2** The result of TUNEL in situ terminal apoptosis and CASSASE-3 positive expression in normal, model and geniposide-treated group. (a) and (c) shows TUNEL in situ terminal apoptosis; (b) and (d)shows positive expression for CASSASE-3. Compared with the control group, " \* " represent a significant difference ( $P<0.05$ ); "\*\*\* " represent extremely difference ( $P<0.01$ ). Compared with the model group, "#" represent a significant difference ( $P<0.05$ ); "## " represent extremely difference ( $P<0.01$ ). C: control group; M: model group; G: geniposide-treated group.

### Positive mode

### Negative mode

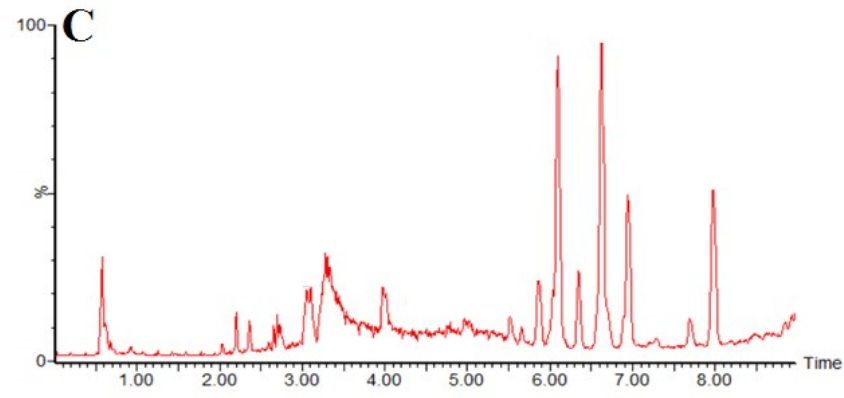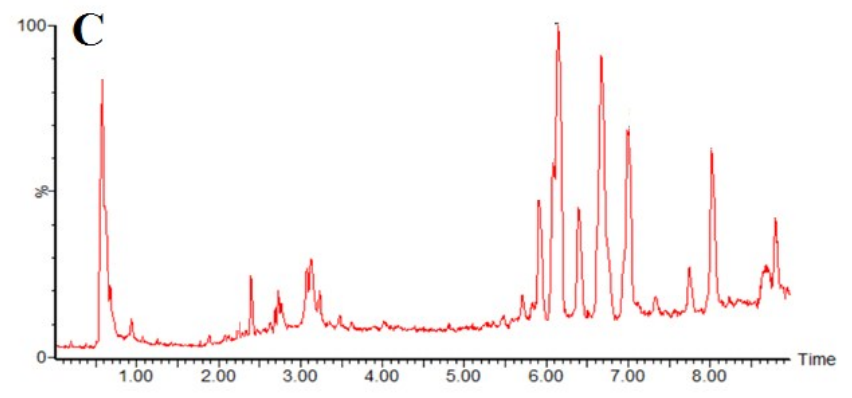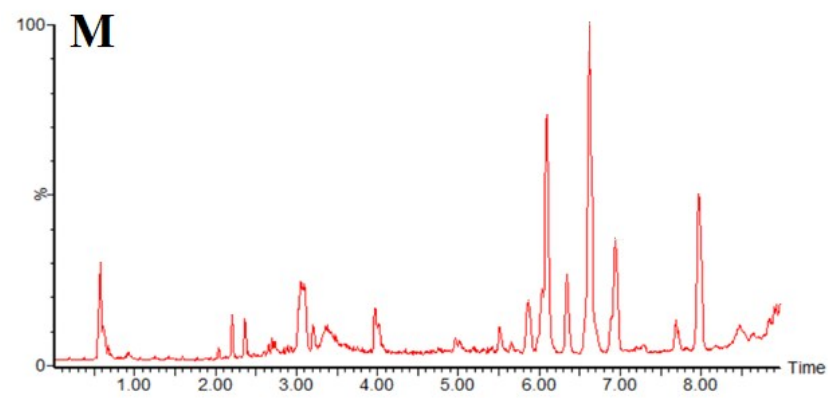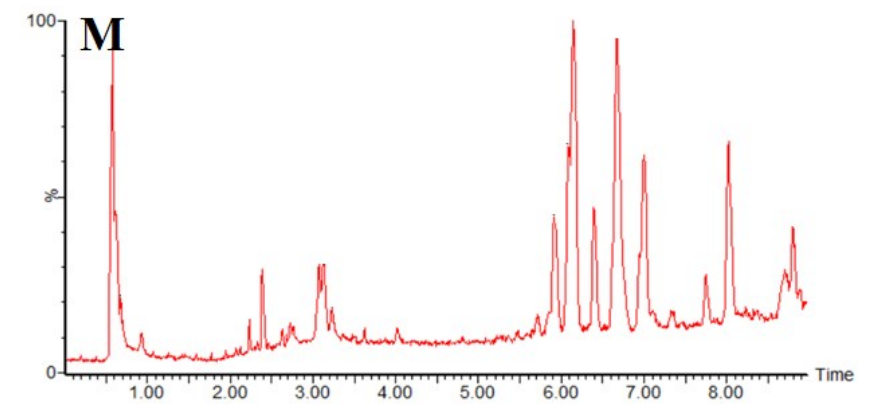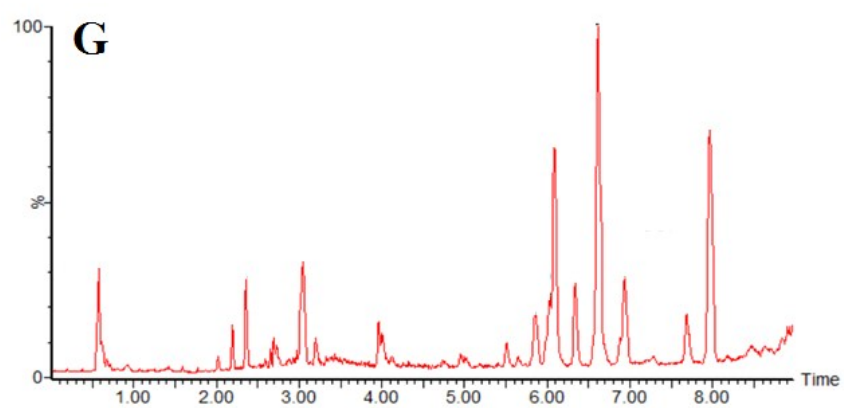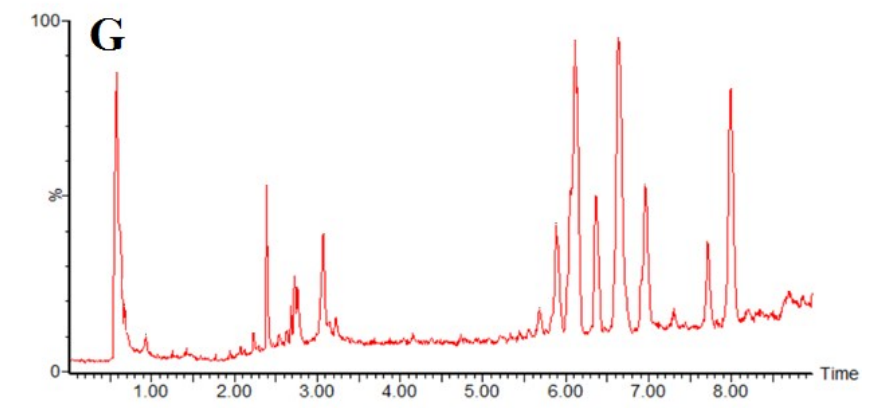

**Fig.S3** UPLC-Q/TOF-MS total ion chromatogram of blood samples from the control, model group and geniposide-treated group in positive and negative ion mode. C: control group; M: model group; G: geniposide-treated group.

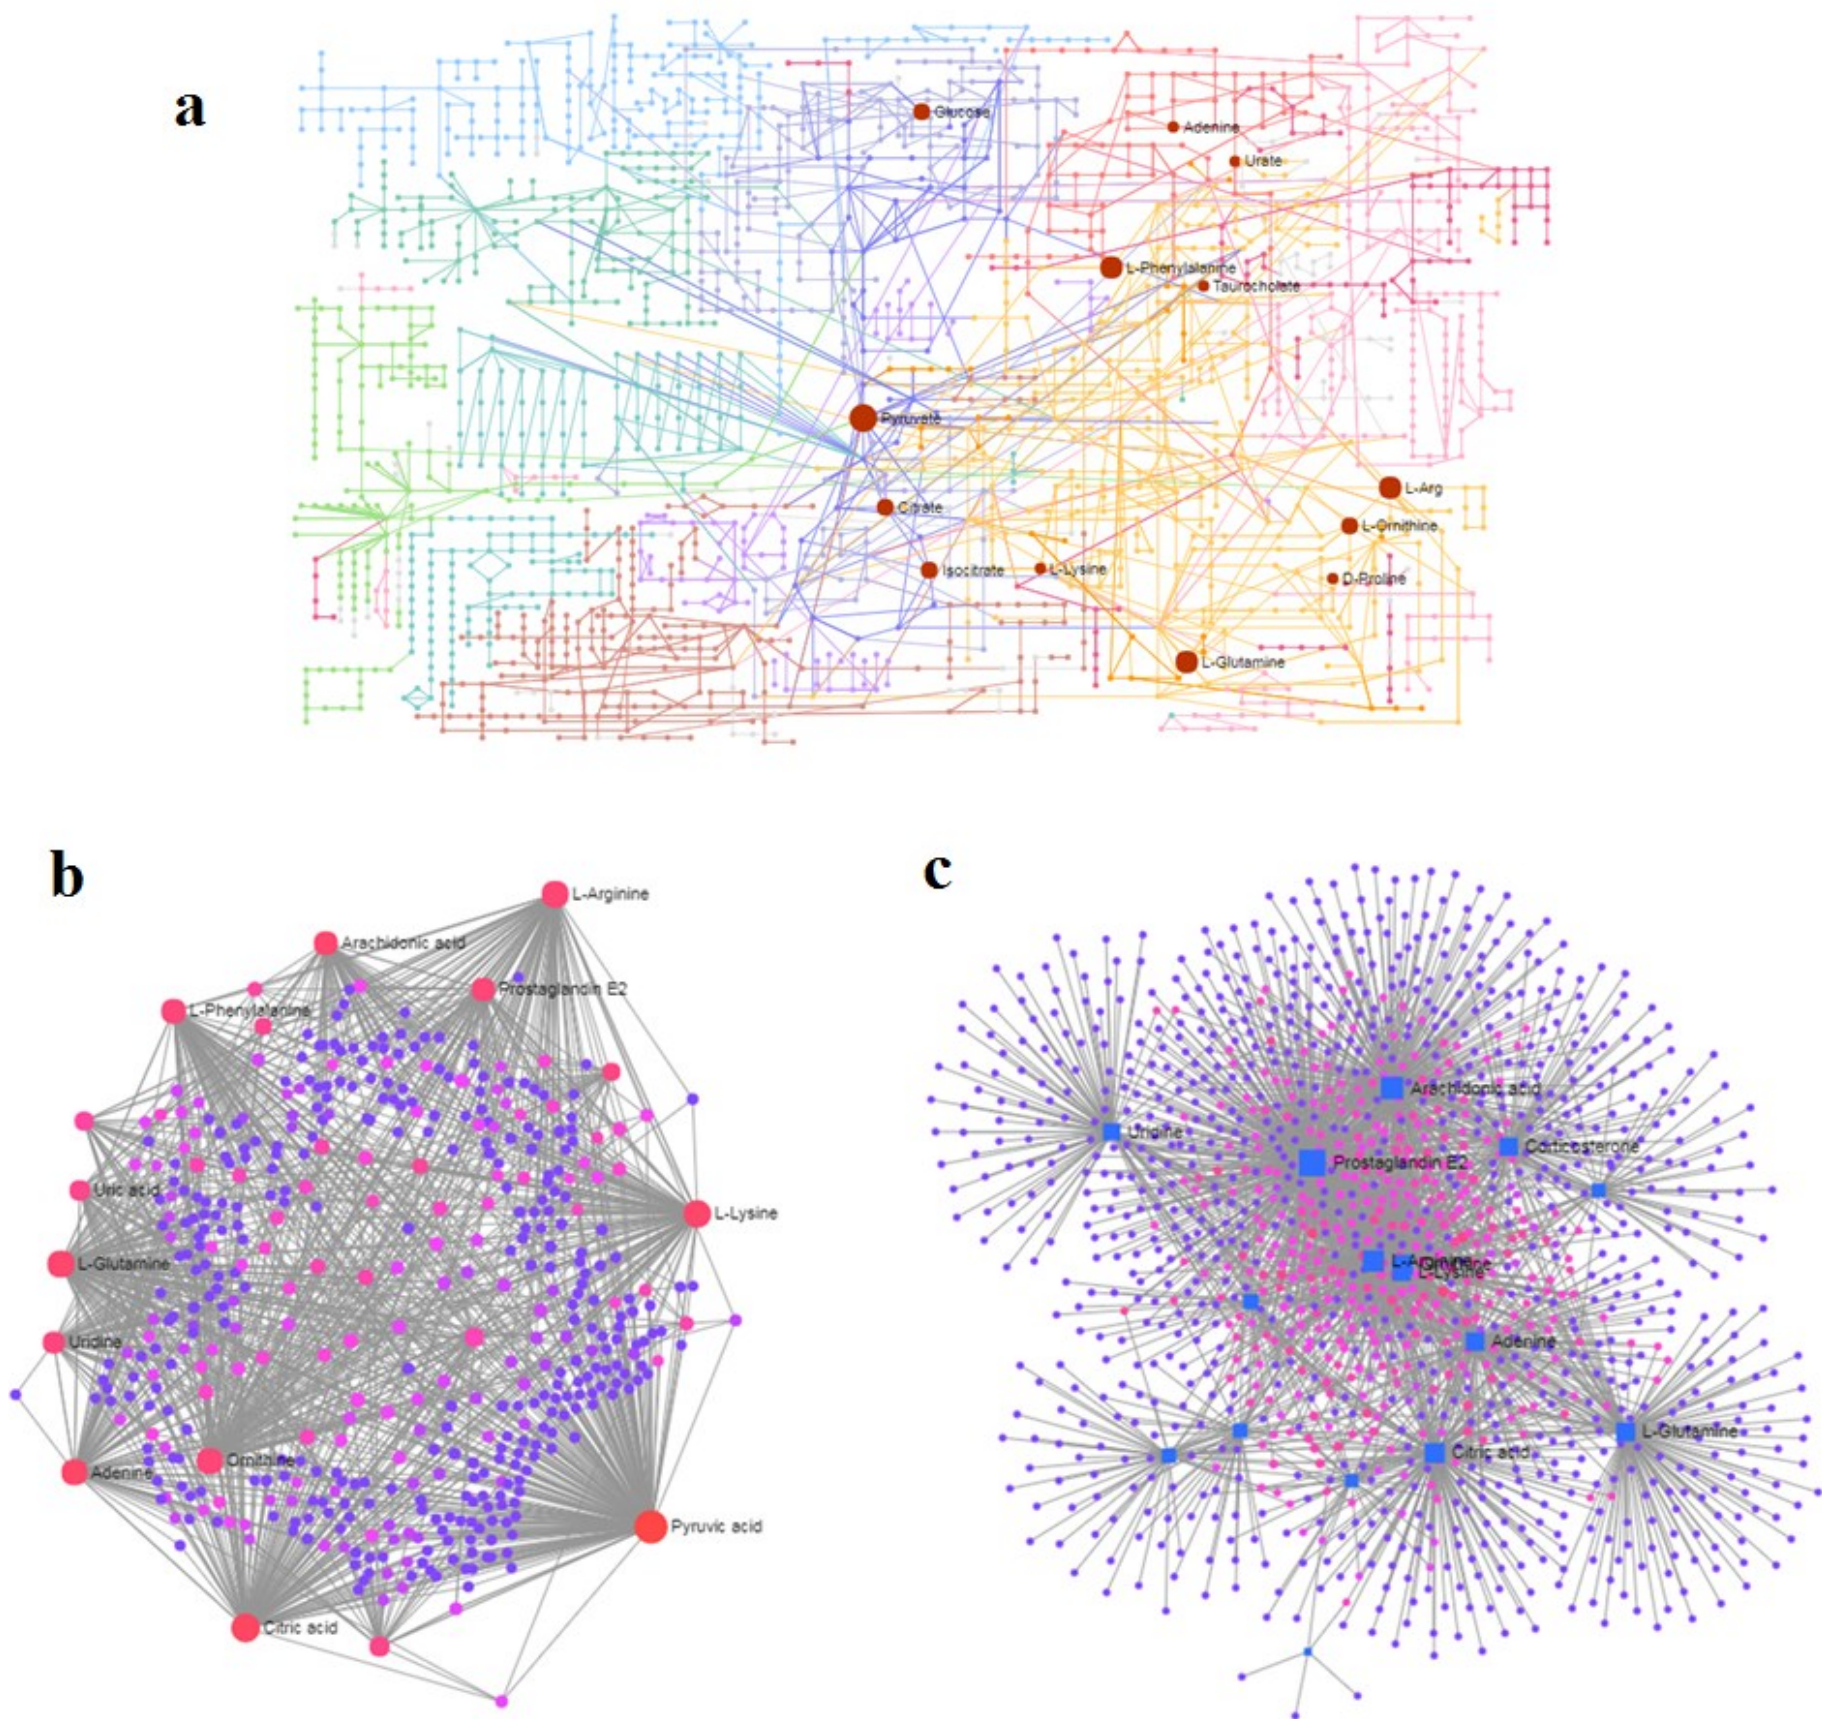

**Fig.S4** (a) KEGG global metabolic network related with geniposide against ALD. Metabolite-metabolite (b) and metabolites-gene(c) interaction network associated with geniposide therapeutic effect on ALD mouse.

**Table S1** Changes of metabolites of ALD animals after geniposide treatment.

| No. | Rt(min) | Ion form | m/z    | Proposed compound    | Formula    | Trend in model | HMDB      | Regulated by Geniposide |
|-----|---------|----------|--------|----------------------|------------|----------------|-----------|-------------------------|
| 1   | 0.62    | M-H      | 191.02 | isocitric acid       | C6H8O7     | ↓              | HMDB00193 | *                       |
| 2   | 0.74    | M-H      | 131.08 | Ornithine            | C5H12N2O2  | ↑              | HMDB00214 | *                       |
| 3   | 0.87    | M+H      | 175.12 | Arginine             | C6H14N4O2  | ↑              | HMDB00517 | *                       |
| 4   | 1.06    | M+H      | 147.11 | Lysine               | C6H14N2O2  | ↑              | HMDB00182 | *                       |
| 5   | 1.27    | M+H      | 169.04 | Uric acid            | C5H4N4O3   | ↑              | HMDB00289 | *                       |
| 6   | 1.43    | M-H      | 243.06 | Uridine              | C9H12N2O6  | ↓              | HMDB00296 | *                       |
| 7   | 1.60    | M+H      | 215.02 | Citric acid          | C6H8O7     | ↑              | HMDB00094 | *                       |
| 8   | 1.76    | M-H      | 131.05 | Asparagine           | C4H8N2O3   | ↓              | HMDB33780 | *                       |
| 9   | 2.47    | M+H      | 205.10 | Tryptophan           | C11H12N2O2 | ↓              | HMDB13609 |                         |
| 10  | 2.72    | M-H      | 212.00 | Indoxyl sulfate      | C8H7NO4S   | ↓              | HMDB00682 |                         |
| 11  | 3.02    | M+H      | 136.06 | Adenine              | C5H5N5     | ↓              | HMDB00034 | *                       |
| 12  | 3.21    | M-H      | 145.06 | Glutamine            | C5H10N2O3  | ↓              | HMDB00641 | *                       |
| 13  | 3.36    | M+H      | 181.07 | Glucose              | C6H12O6    | ↓              | HMDB00122 | *                       |
| 14  | 3.68    | M+H      | 144.08 | N,N-dimethylglycine  | C8H11N     | ↑              | HMDB01020 |                         |
| 15  | 4.89    | M+H      | 116.07 | Proline              | C5H9NO2    | ↑              | HMDB03411 | *                       |
| 16  | 5.06    | M-H      | 285.21 | Hexadecanedioic acid | C16H30O4   | ↓              | HMDB00672 |                         |
| 17  | 5.75    | M+H      | 184.10 | Carnitine            | C7H15NO3   | ↑              | HMDB00062 |                         |
| 18  | 5.88    | M-H      | 514.28 | Taurocholic acid     | C26H45NO7S | ↓              | HMDB00036 | *                       |
| 19  | 6.05    | M+H      | 265.17 | Oxodecanoic acid     | C14H26O3   | ↓              | HMDB10730 |                         |
| 20  | 6.14    | M+H      | 488.30 | Glycocholic acid     | C26H43NO6  | ↑              | HMDB00138 |                         |
| 21  | 6.29    | M-H      | 87.01  | Pyruvic acid         | C3H4O3     | ↓              | HMDB00243 | *                       |
| 22  | 6.41    | M+H      | 166.08 | Phenylalanine        | C9H11NO2   | ↑              | HMDB00159 | *                       |
| 23  | 6.52    | M-H      | 345.21 | Corticosterone       | C21H30O4   | ↑              | HMDB01547 | *                       |
| 24  | 6.64    | M+H      | 353.24 | Prostaglandin E2     | C20H32O5   | ↑              | HMDB01220 | *                       |
| 25  | 6.75    | M+H      | 300.29 | Sphingosine          | C18H37NO2  | ↑              | HMDB00252 | *                       |
| 26  | 6.86    | M+H      | 327.23 | Arachidonic acid     | C20H32O2   | ↑              | HMDB01043 | *                       |
| 27  | 7.15    | M-H      | 520.34 | LysoPC(18:1)         | C26H52NO7P | ↓              | HMDB02815 |                         |
| 28  | 7.60    | M-H      | 508.34 | LysoPC(17:0)         | C25H52NO7P | ↓              | HMDB12108 |                         |
| 29  | 7.71    | M+H      | 482.32 | LysoPC(15:0)         | C23H48NO7P | ↓              | HMDB10381 | *                       |
| 30  | 7.83    | M+H      | 282.28 | Oleamide             | C18H35NO   | ↑              | HMDB02117 |                         |
| 31  | 7.99    | M-H      | 494.33 | LysoPC(16:0)         | C24H50NO7P | ↓              | HMDB10382 | *                       |
| 32  | 8.11    | M+H      | 321.24 | 8-HETE               | C20H32O3   | ↓              | HMDB04679 |                         |
| 33  | 8.27    | M-H      | 253.22 | Palmitoleic acid     | C16H30O2   | ↑              | HMDB03229 |                         |
